# Supplementary material
Source: publisher figshare collection journal article supplement (https://tandf.figshare.com/ndownloader/files/21196425)
Supplement: Supplementary file 1 [file 21196425]

**Adsorption efficiency of graphene oxide towards cyanine dyes with different alkyl chain lengths**

**Abeer S. Elsherbiny1, Ali H. Gemeay1, Mohamed A. Salem1**

*1 Chemistry Department, Faculty of Science, Tanta University, Tanta 31527, Egypt*

* Corresponding Author Tel.: +20 01111586524; Fax: +20 40 3350804

E-mail: [abeer.elsherbiny@science.tanta.edu.eg](mailto:abeer.elsherbiny@science.tanta.edu.eg), [abeer.elsherbiny@yahoo.de](mailto:abeer.elsherbiny@yahoo.de)

**Kinetic models**

pseudo-first-order model: *Log (qe – qt) = logqe – (k1/2.303) t*  (1)

pseudo-second-order model*: t /qt = 1/k2qe2 + t/qe* (2)

where qe is the amount of cyanine dye adsorbed at equilibrium and qt is its amount adsorbed (mol g−1) at time t. k1(min−1) and k2 (g mol−1 min−1) are pseudo-first and pseudo-second order rate constants [1].

Weber–Morris intraparticle diffusion model equation is,

*qt = kp t0.5 + C* (3)

kp is the rate constant of intraparticle diffusion rate (mol/g min0.5) and C is constant (mol g−1) referring to the thickness of the boundary layer.

The Boyd kinetic equation is expressed as [2],

*F = 1 − [(6/π2) exp (−Bt)]*  (4)

F is the fraction of solute adsorbed at time t and B is a mathematical function of F where

*F = qt / qe* (5)

From Equs. 5 & 6, the kinetic expression is,

*Bt= −0.4977 – ln (1 − F)* (6)

**Isotherm models**

Langmuir: *Ce/qe = (1/qmax KL) + Ce/qmax* [3](7)

Freundlich: *ln qe= ln KF + (1/n) ln Ce* [4] (8)

Dubinin-Radushkevich: *lnqe = ln qm – B ε2* [5](9)

Temkin and Pyzhev: *qe= B1 ln KT + B1 ln Ce*[6](10)

where, KL is the Langmuir constant associated to the adsorption energy (L g−1), qm is the maximum amount of dye adsorbed to form monolayer (mol g−1), KF is the Freundlich constant which shows roughly the adsorption capacity, 1/n is the intensity of adsorption, ε is the Polanyi potential that equals to *RT ln (1+1/Ce)*, B is a constant related to the mean free energy of adsorption (mol2 J-2) [18], B1 is constant equals to RT/ b, and KT is the Temkin constant

**Fig. S1** Plot of qt vs. t0.5 for the adsorption of [R5, R7, and R10] = 9 x 10-5 M onto GO nanosheets (0.01g) at pH = 7 and 25ºC.

Fig. 2. Boyd Plot for the adsorption of [R5, R7, and R10] = 9 x 10-5 M onto GO nanosheets (0.01g) at pH = 7 and 25ºC

**References**

[1] Elsherbiny, A.S.; El-Hefnawy, M.E.; Gemeay,A .H. Linker impact on the adsorption capacity of polyaspartate/montmorillonite composites towards methyl blue removal, Chem. Eng. J., 2017, 315, 142-151

[2] Zou,W.; Li, K.; Bai, H.; Shi, X.; () Enhanced cationic dyes removal from aqueous solution by oxalic acid modified rice husk, J. Chem. Eng. Data., 2011, 56, 1882−1891

[3] Langmuir, I. The constitution and fundamental properties of solids and liquids, J. Am. Chem. Soc., 1916, 38, 2221–2295

[4] Freundlich, H.M.F. Over the adsorption in solution, Z. Phys. Chem., 1906, 57, 385–471

[5] Dubinin, M.M., Radushkevich L.V. Equation of the Characteristic Curve of Activated Charcoal, Proc. Acad Sci USSR Phys. Chem. Sect., 1947, 55, 331–333.

[6] Temkin, M.; Pyzhev, V. Kinetics of ammonia synthesis on promoted iron catalysts. Acta Physiochimica USSR, 1940, 12, 217–222.
